# Supplementary material
Source: Springer Nature journal article supplement (https://www.springermedizin.de/resource/supplementary/13256_2011_2317_MOESM4_ESM.pdf/9649118)

# FGF-23(pg/ml)

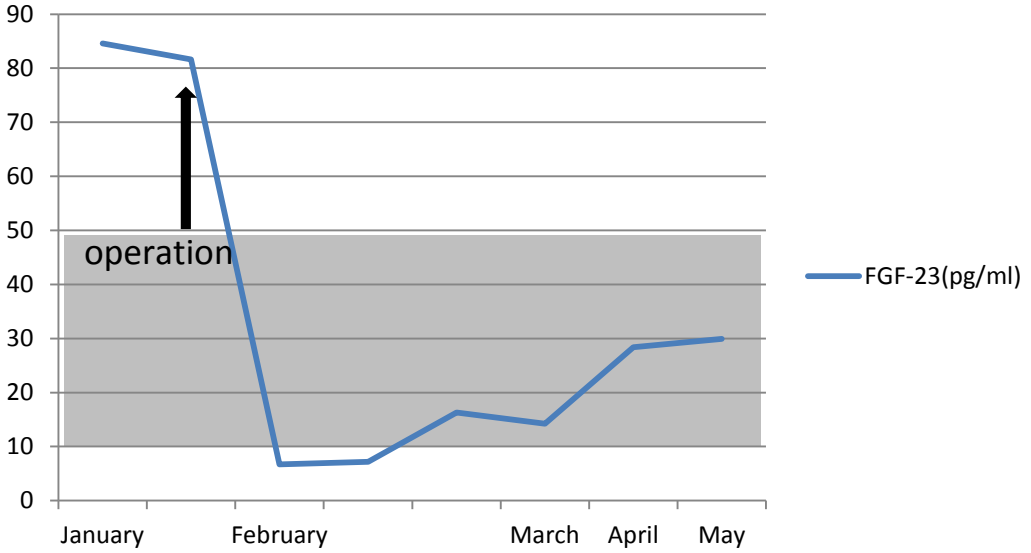

# P(mg/dl)

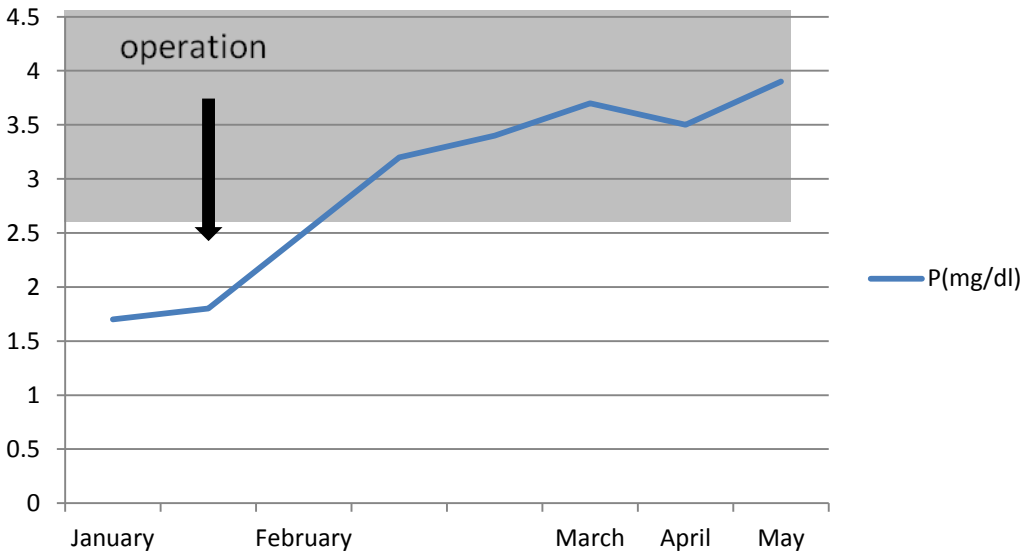

Supplement: MOESM4 [file 9649118]
